# Supplementary material for: A NiS co-catalyst decorated Zn3In2S6/g-C3N4 type-II ball-flower-like nanosphere heterojunction for efficient photocatalytic hydrogen production
Source: Royal Society of Chemistry journal article supplement (doi:10.1039/d1dt01589c), 2021-01-01
Supplement: d1dt01589c1.pdf [file d1dt01589c1.pdf]

## Supporting information

### **NiS co-catalyst decorated Zn<sub>3</sub>In<sub>2</sub>S<sub>6</sub>/g-C<sub>3</sub>N<sub>4</sub> type-II ball-flower like nanosphere heterojunction for efficient photocatalytic hydrogen production**

Xiang-yin Ji,<sup>a</sup> Rui-tang Guo,<sup>a,b\*</sup> Zhi-dong Lin,<sup>a</sup> Long-fei Hong,<sup>a</sup>

Ye Yuan,<sup>a</sup> Wei-guo Pan,<sup>a,b\*</sup>

<sup>a</sup> College of Energy and Mechanical Engineering, Shanghai University of Electric Power, Shanghai, China

<sup>b</sup> Shanghai Engineering Research Center of Power Generation Environment Protection, Shanghai, China

**Corresponding author1:** Rui-tang Guo

**Email:** grta@zju.edu.cn

**Corresponding author2:** Wei-guo Pan

**Email:** pweiguo@163.com

1. Characterization.
2. Fig. S1 Elemental mapping images of the 2.0% NiS/ZIS/CN composite.
3. Fig. S2. The EDS spectra of 2.0%NiS/ZIS/CN) composite.
4. Fig. S3 Full survey scanned XPS spectra of (a) CN, ZIS, 2.0% NiS/ZIS/CN and NiS/CN and (b) NiS composites.
5. Fig. S4 (a) Photocatalytic H<sub>2</sub> production by the 2.0% NiS/ZIS/CN sample over 5 cycles; (b) XRD patterns of the 2.0% NiS/ZIS/CN composite before and after 5 cycles; (c) TEM of the 2.0% NiS/ZIS/CN composite before and after 5 cycles.
6. Fig. S5 TEM image of the 2.0% NiS/ZIS/CN sample over 5 cycles.
7. Fig. S6 (a) High-resolution of C 1s and (b) N 1s for CN and 2.0% NiS/ZIS/CN. (c) In 3d spectra and (d) Zn 2p spectra of 2.0% NiS/ZIS/CN composite. (e) S 2p spectra of ZIS and 2.0% NiS/ZIS/CN. (f) Ni 2p spectra of 2.0% NiS/ZIS/CN composite over 5 cycles.
8. Table S1. The surface properties of samples.
9. Table S2. The activity corresponding to the type and dosage of sacrificial agent.

## 1. Characterization

X-ray diffraction patterns (XRD) analysis was proceeded on a Bruker D8 Advance diffractometer to study the crystal phase of the photocatalysts. X-ray photoelectron spectroscopy (XPS) (ESCALAB 250 xi, USA) with Al K $\alpha$  radiation sources was employed to verify the elemental chemical states. The surface morphology and microstructure of the photocatalysts were studied by scanning electron microscopy (SEM) (Phillips XL-30 FEG/NEW) and transmission electron microscopy (TEM) (Phillips Model CM200), respectively. N<sub>2</sub> adsorption-desorption measurement (Quantachrome Autosorb-iQ-AG instrument) was used to determine the specific surface area and pore structure of the samples. Ultraviolet visible diffuse reflection spectra (UV-vis DRS) and photoluminescence (PL) spectra were recorded to analyze the optical properties. The Fluorescence lifetime spectrophotometer (FLS980) was used to record the time-resolved fluorescence decay curves.

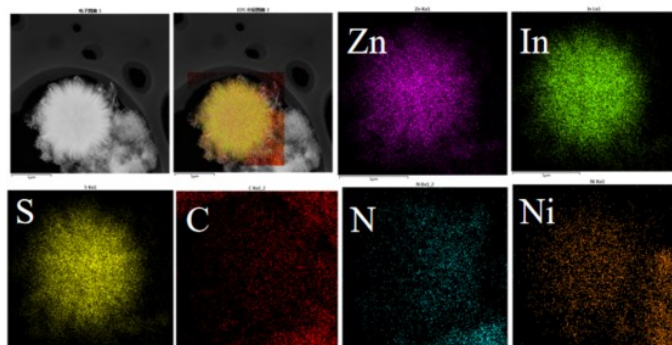

**Fig. S1** Elemental mapping images of the 2.0% NiS/ZIS/CN composite.

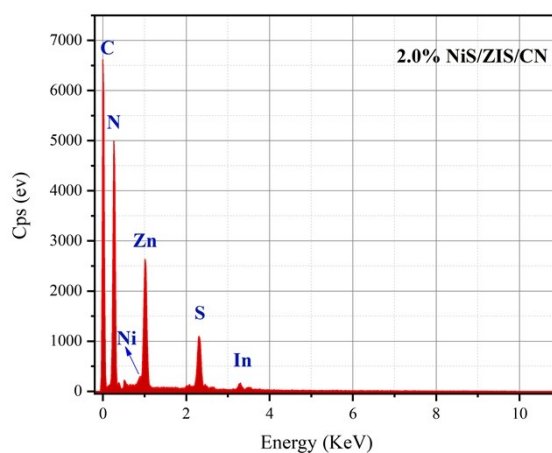

**Fig. S2** The EDS spectra of 2.0%NiS/ZIS/CN) composite.

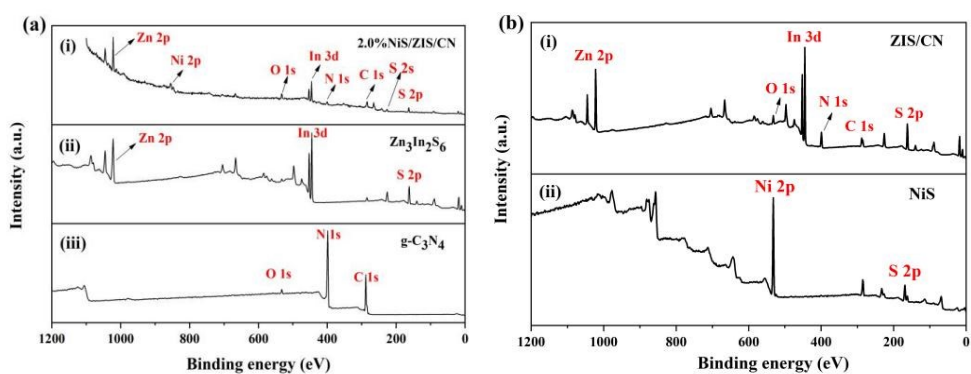

**Fig. S3** Full survey scanned XPS spectra of (a) CN, ZIS, 2.0% NiS/ZIS/CN and NiS/CN and (b) NiS composites.

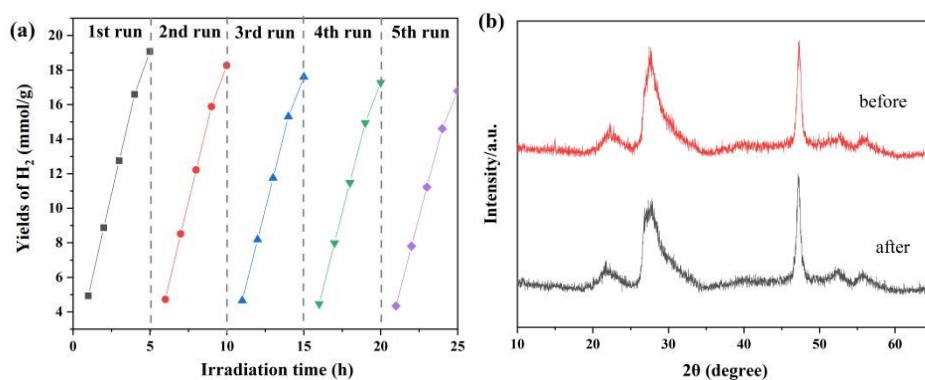

**Fig. S4** (a) Photocatalytic H<sub>2</sub> production by the 2.0% NiS/ZIS/CN sample over 5 cycles; (b) XRD patterns of the 2.0% NiS/ZIS/CN composite before and after 5 cycles; (c) TEM of the 2.0% NiS/ZIS/CN composite before and after 5 cycles.

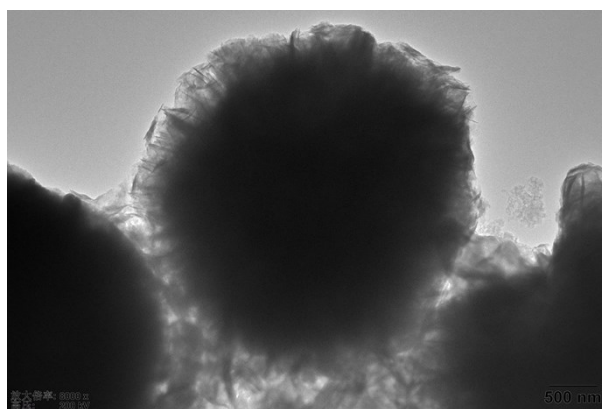

**Fig. S5** TEM image of the 2.0% NiS/ZIS/CN sample over 5 cycles.

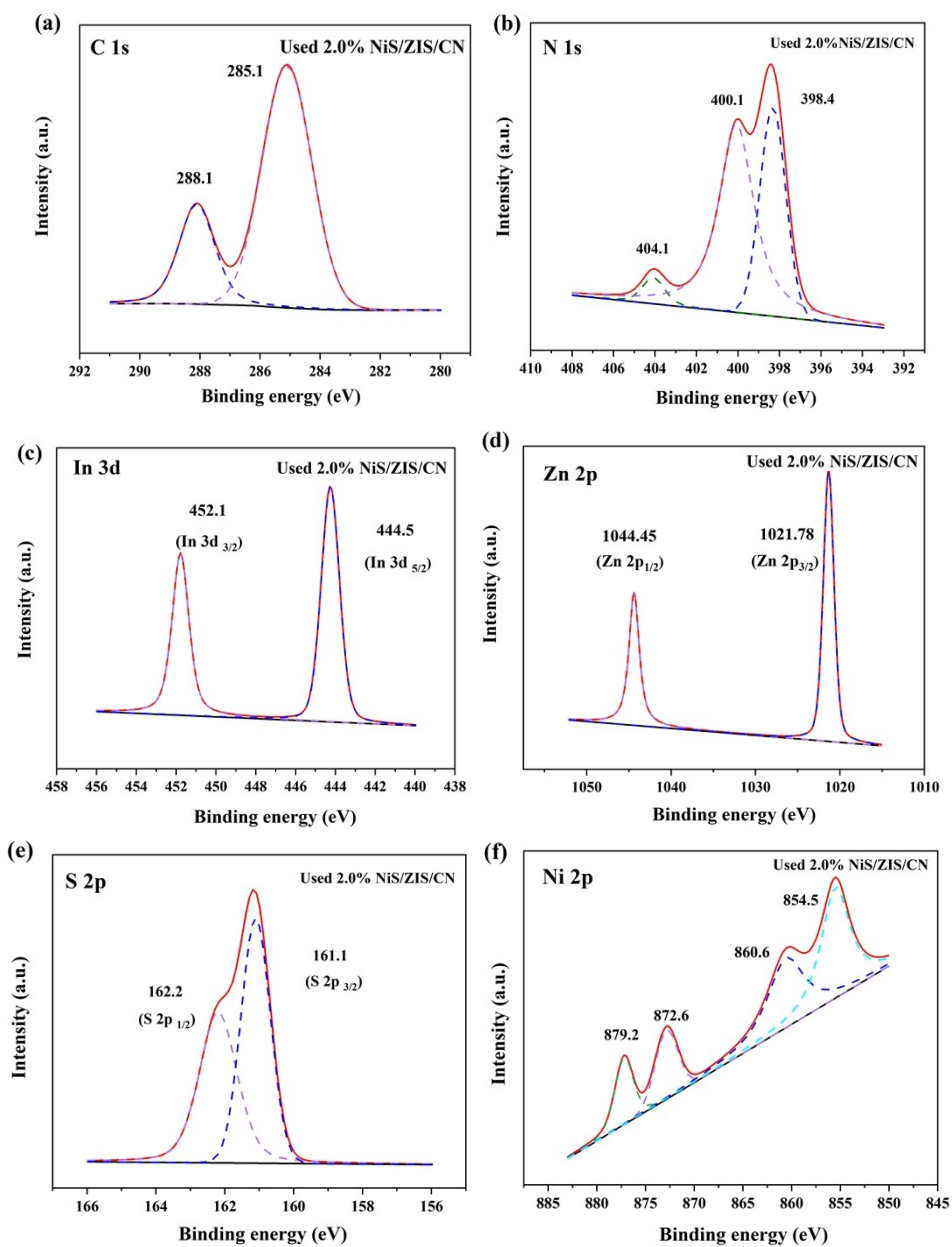

**Fig. S6** (a) High-resolution of C 1s and (b) N 1s for CN and 2.0% NiS/ZIS/CN. (c) In 3d spectra and (d) Zn 2p spectra of 2.0% NiS/ZIS/CN composite. (e) S 2p spectra of ZIS and 2.0% NiS/ZIS/CN. (f) Ni 2p spectra of 2.0% NiS/ZIS/CN composite over 5 cycles.

**Table S1.** The surface properties of samples.

| Samples         | S <sub>BET</sub> (m <sup>2</sup> /g) | Pore diameter (nm) |
|-----------------|--------------------------------------|--------------------|
| CN              | 21.49                                | 4.151              |
| ZIS             | 87.23                                | 4.153              |
| NiS             | 10.51                                | 1.938              |
| NiS/CN          | 48.09                                | 3.821              |
| ZIS/CN          | 86.35                                | 3.833              |
| 1.0% NiS/ZIS/CN | 91.08                                | 4.152              |
| 1.5% NiS/ZIS/CN | 81.71                                | 4.157              |
| 2.0% NiS/ZIS/CN | 108.10                               | 3.830              |
| 2.5% NiS/ZIS/CN | 84.06                                | 3.838              |

**Table S2.** The activity corresponding to the type and dosage of sacrificial agent.

| Sacrificial agent | Amount (mL) | Corresponding activity( $\text{mmol}\cdot\text{g}^{-1}\cdot\text{h}^{-1}$ ) |
|-------------------|-------------|-----------------------------------------------------------------------------|
| Glycerine         | 20          | 2.976                                                                       |
| Lactic acid       | 20          | 3.025                                                                       |
| Methyl alcohol    | 20          | 3.436                                                                       |
| TEOA              | 10          | 3.497                                                                       |
| TEOA              | 20          | 4.135                                                                       |
| TEOA              | 30          | 3.682                                                                       |
